# Supplementary material for: Chiral Recognition of Homochiral Poly (amidoamine) Dendrimers Substituted with R- and S-Glycidol by Keratinocyte (HaCaT) and Squamous Carcinoma (SCC-15) Cells In Vitro
Source: MDPI journal article supplement (doi:10.3390/polym13071049), 2021-03-27
Supplement: s1 [file s1]

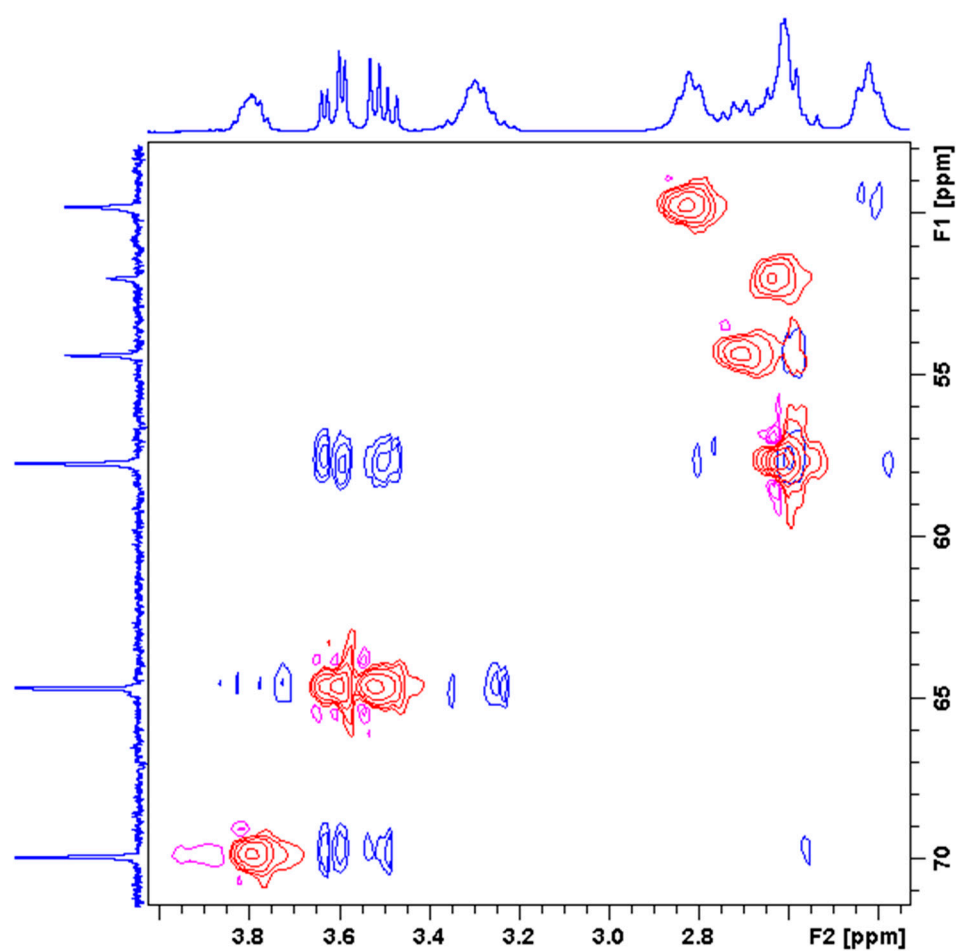

**Figure S1.** Combined HSQC and HMBC map for G2<sup>32S</sup>gl. Spectra were taken in D<sub>2</sub>O. One-bond coupling peaks are shown in red, while relevant longer range (two-bond <sup>1</sup>H-<sup>13</sup>C coupled) peaks are drawn in blue.

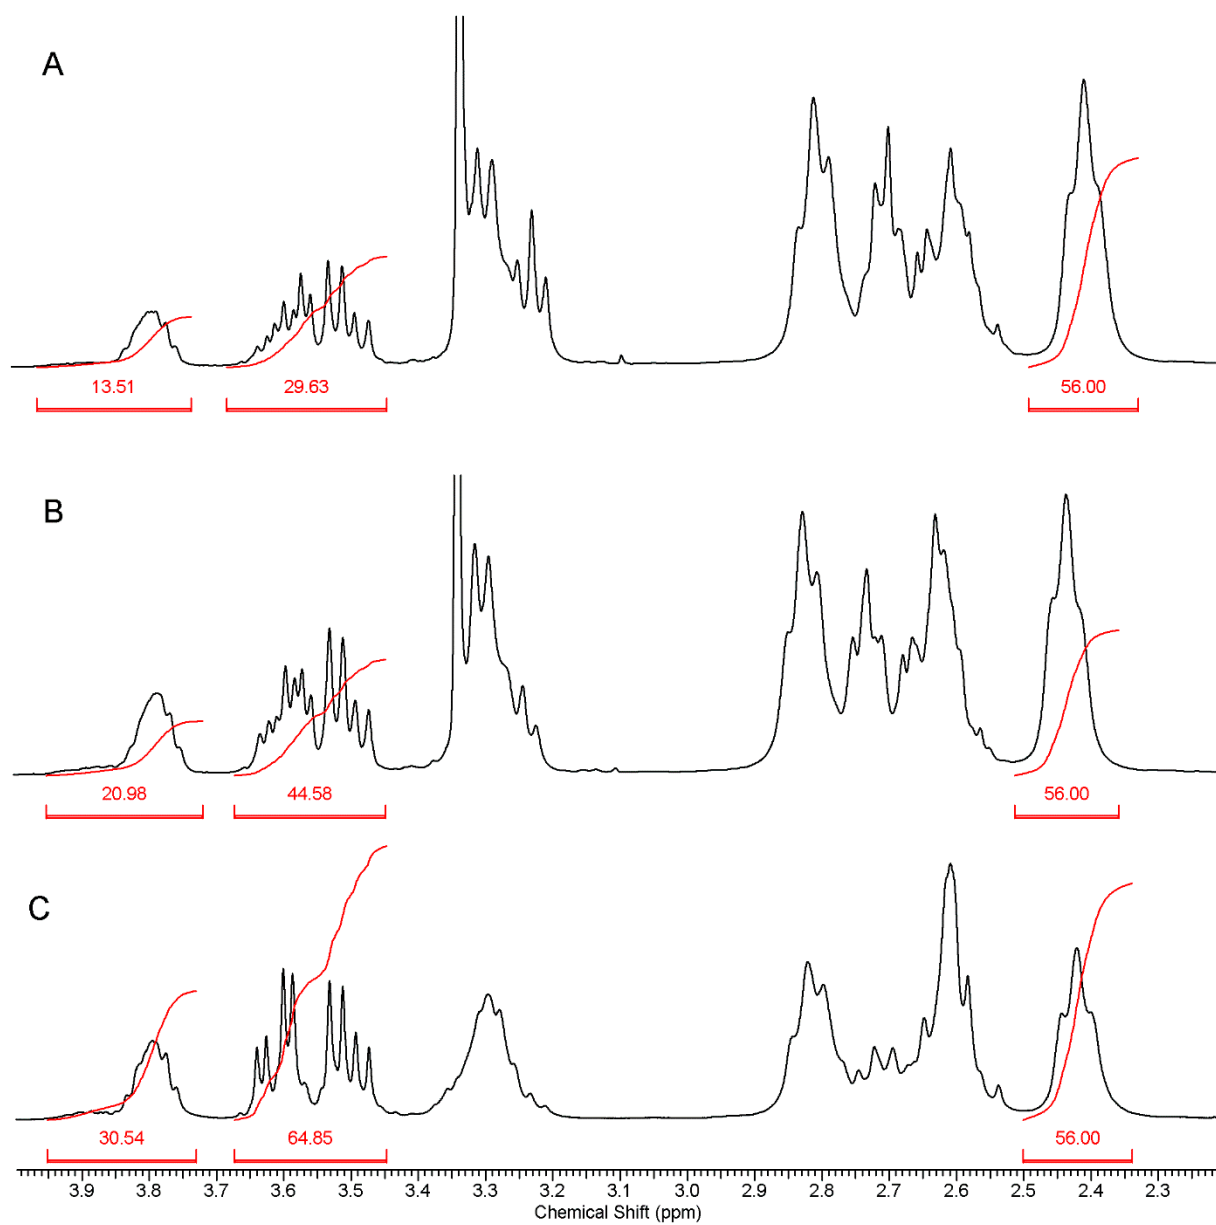

**Figure S2.** The  $^1\text{H}$  NMR spectra of (A): G2<sup>14Rgl</sup>, (B): G2<sup>22Rgl</sup>, and (C): G2<sup>32Rgl</sup> in  $\text{D}_2\text{O}$ .

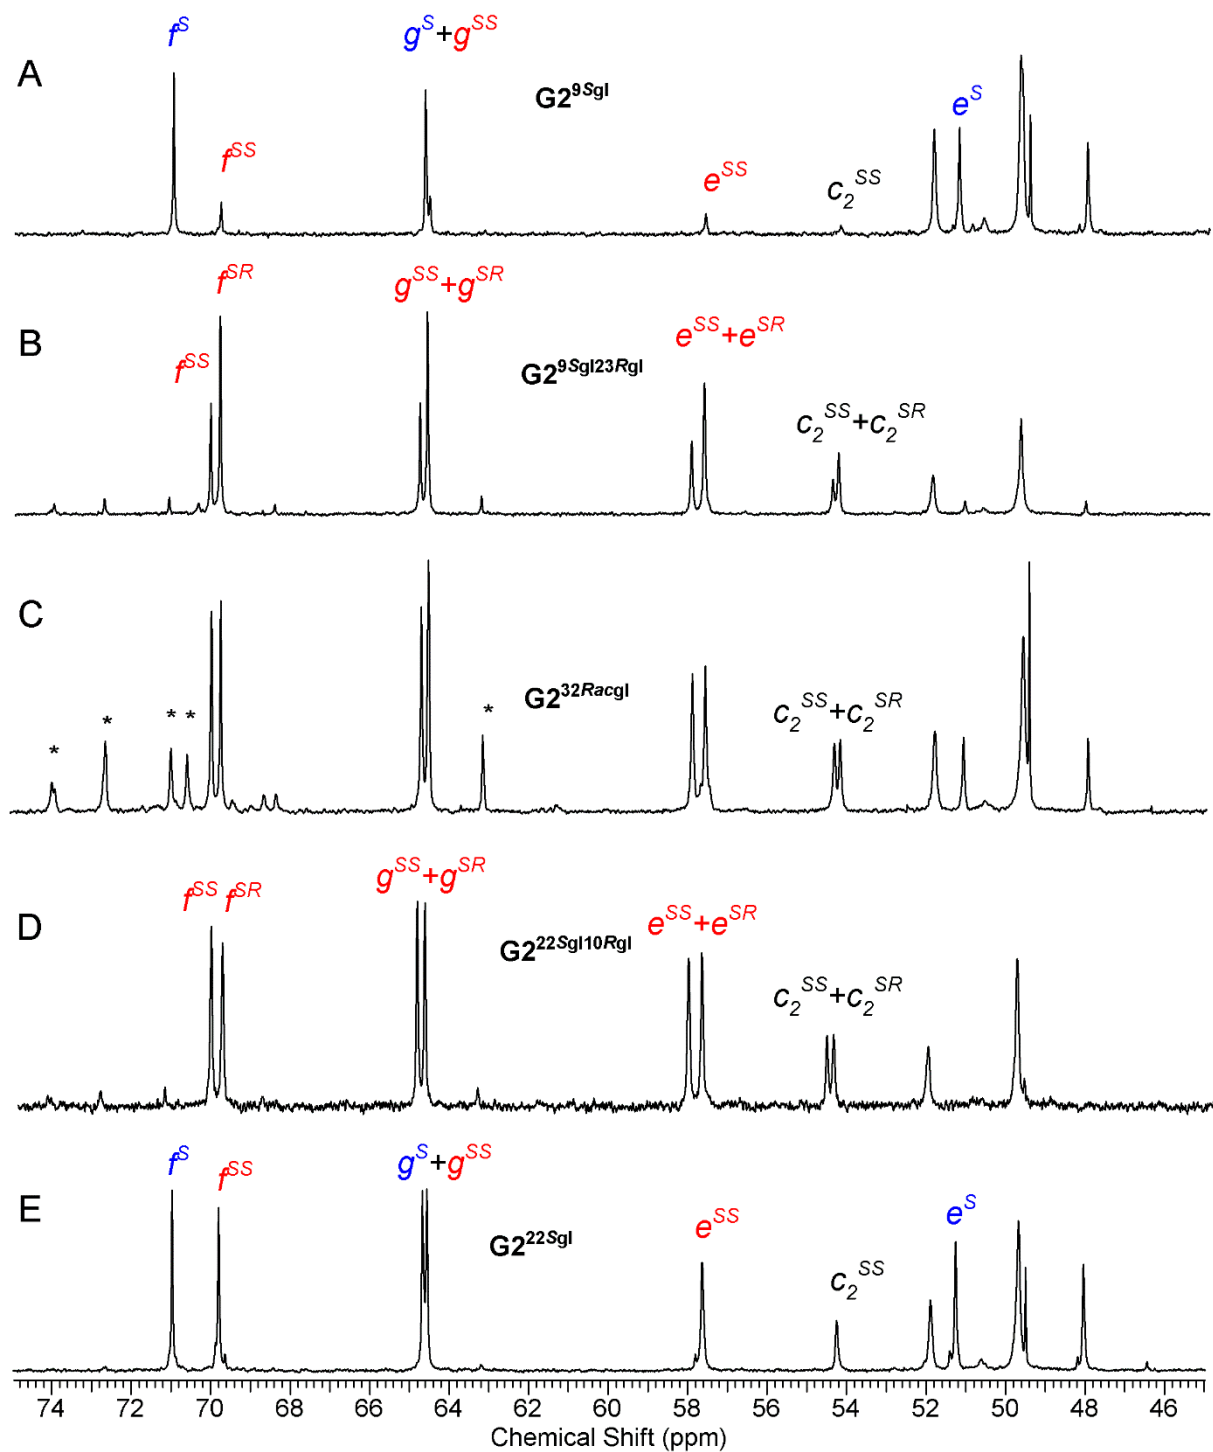

**Figure S3.** The relevant regions of  $^{13}\text{C}$  NMR spectra (from top to bottom): (A):  $\text{G2}^9\text{Sgl}$ , (B):  $\text{G2}^9\text{Sgl23Rgl}$ , (C):  $\text{G2}^{32}\text{Racgl}$ , (D):  $\text{G2}^{22}\text{Sgl10Rgl}$ , and (E):  $\text{G2}^{22}\text{Sgl}$  in  $\text{D}_2\text{O}$ . For peak labeling see section 3.1.2.
